# Supplementary material for: The effectiveness of public health interventions against COVID-19: Lessons from the Singapore experience
Source: PLoS One. 2021 Mar 30;16(3):e0248742. doi: 10.1371/journal.pone.0248742 (PMC8009429; doi:10.1371/journal.pone.0248742)
Supplement: S2 Data — (XLSX) [file pone.0248742.s003.xlsx]

## Sheet: S2 Data
time	newcases	totalcases	newcases total	total cases total	dead
0	1	1	1	3	0
1	2	3	2	3	0
2	0	3	0	4	0
3	1	4	1	5	0
4	1	5	1	7	0
5	2	7	2	10	0
6	3	10	3	13	0
7	3	13	3	16	0
8	3	16	3	18	0
9	2	18	2	18	0
10	0	18	0	18	0
11	0	18	0	24	0
12	6	24	6	28	0
13	4	28	4	30	0
14	2	30	2	33	0
15	3	33	3	40	0
16	7	40	7	43	0
17	3	43	3	45	0
18	2	45	2	47	0
19	2	47	2	50	0
20	3	50	3	58	0
21	8	58	8	67	0
22	9	67	9	72	0
23	5	72	5	75	0
24	3	75	3	77	0
25	2	77	2	81	0
26	4	81	4	84	0
27	3	84	3	85	0
28	1	85	1	86	0
29	1	86	1	89	0
30	3	89	3	89	0
31	0	89	0	90	0
32	1	90	1	91	0
33	1	91	1	93	0
34	2	93	2	96	0
35	3	96	3	98	0
36	2	98	2	102	0
37	4	102	4	106	0
38	4	106	4	108	0
39	2	108	2	110	0
40	2	110	2	112	0
41	2	112	2	117	0
42	5	117	5	130	0
43	13	130	13	138	0
44	8	138	8	150	0
45	12	150	12	160	0
46	10	160	10	166	0
47	6	166	6	178	0
48	12	178	12	187	0
49	9	187	9	200	0
50	13	200	13	212	0
51	12	212	12	226	0
52	14	226	14	243	0
53	17	243	17	266	0
54	23	266	23	313	0
55	47	313	47	345	0
56	32	345	32	385	0
57	40	385	40	432	0
58	47	432	47	455	2
59	23	455	23	509	2
60	54	509	54	558	2
61	49	558	49	631	2
62	73	631	73	683	2
63	52	683	52	732	2
64	49	732	49	802	2
65	70	802	70	844	2
66	40	842	42	879	3
67	32	874	35	926	3
68	41	915	47	1000	3
69	61	976	74	1049	3
70	41	1017	49	1114	4
71	43	1060	65	1189	5
72	49	1109	75	1309	6
73	62	1171	120	1375	6
74	32	1203	66	1481	6
75	49	1252	106	1623	6
76	68	1320	142	1910	6
77	59	1379	287	2108	7
78	57	1436	198	2299	7
79	39	1475	191	2532	8
80	45	1520	233	2918	8
81	52	1572	386	3252	9
82	59	1631	334	3699	10
83	41	1672	447	4427	10
84	52	1724	728	5050	10
85	64	1788	623	5992	11
86	49	1837	942	6588	11
87	52	1889	596	8014	11
88	57	1946	1426	9125	11
89	61	2007	1111	10141	12
90	49	2056	1016	11178	12
91	55	2111	1037	12075	12
92	44	2155	897	12693	12
93	21	2176	618	13624	12
94	45	2221	931	14423	12
95	35	2256	799	14951	14
96	17	2273	528	15641	14
97	30	2303	690	16169	14
98	40	2343	528	17101	15
99	27	2370	932	17548	17
100	16	2386	447	18205	17
101	31	2417	657	18778	18
102	13	2430	573	19410	18
103	27	2457	632	20198	19
104	29	2486	788	20939	20
105	16	2502	741	21707	20
106	18	2520	768	22460	20
107	14	2534	753	23336	20
108	16	2550	876	23822	20
109	5	2555	486	24706	21
110	7	2562	884	25381	21
111	4	2566	675	26133	21
112	2	2568	752	26926	21
113	2	2570	793	27391	22
114	8	2578	465	28073	22
115	9	2587	682	28378	22
116	2	2589	305	28829	22
117	1	2590	451	29399	22
118	8	2598	570	29847	22
119	14	2612	448	30461	23
120	4	2616	614	31103	23
121	11	2627	642	31651	23
122	4	2631	548	31995	23
123	6	2637	344	32378	23
124	2	2639	383	32911	23
125	4	2643	533	33284	23
126	1	2644	373	33895	23
127	9	2653	611	34401	23
128	5	2658	506	34919	23
129	2	2660	518	35327	23
130	0	2660	408	35871	24
131	4	2664	544	36440	24
132	7	2671	569	36957	24
133	15	2686	517	37218	25
134	11	2697	261	37562	25
135	7	2704	344	37945	25
136	14	2718	383	38328	25
